# Supplementary material
Source: Springer Nature journal article supplement (https://www.springermedizin.de/resource/supplementary/12887_2012_683_MOESM2_ESM.pdf/9475852)
Supplement: MOESM2 [file 9475852]

| Time line                                 | Whole Population (N = 1464)    |          |
|-------------------------------------------|--------------------------------|----------|
| 4 years of age (ascertainment assessment) | a                              | b        |
| Randomisation                             | Language Delay Group (N = 200) |          |
|                                           | Intervention                   | Controls |
| Intervention Block 1 (1-6 weeks)          | c1 c2                          |          |
| Intervention Block 2 (13-18 weeks)        | c1 c2                          |          |
| Intervention Block 3 (25-30 weeks)        | c1 c2                          |          |
| 5 years of age                            | d e f                          | d        |
| 6 years of age                            | d                              | d        |

|   |                                                                                                                                                                                                                                                                                                                                                                                                                                                                                                                                                                                                                                                                                 |
|---|---------------------------------------------------------------------------------------------------------------------------------------------------------------------------------------------------------------------------------------------------------------------------------------------------------------------------------------------------------------------------------------------------------------------------------------------------------------------------------------------------------------------------------------------------------------------------------------------------------------------------------------------------------------------------------|
| a | Brief written questionnaires completed by parents reporting on child's pragmatic skills, child's health and well being, and general development                                                                                                                                                                                                                                                                                                                                                                                                                                                                                                                                 |
| b | Language ascertainment: formal assessment of child's expressive and receptive language. Children scoring greater than 1.25 SD below the mean on expressive and/or receptive language scores were eligible for the trial                                                                                                                                                                                                                                                                                                                                                                                                                                                         |
| c | Intervention administered by a trained language assistant in the family home over 18 sessions. Sessions are delivered in 3 blocks of six one-hour sessions over 6 weeks, with a 6 week break between each block. The format of each session are as follows:<br><br>c1 (Session 1 of each block) – The language assistant conducts a language screen with the child to determine the specific areas of the child's language that need to be targeted for that block<br><br>c2 (Session 2-6 of each block) – Each session consists of three main activities a) phonological awareness/letter knowledge activity; b) specific language target activity; and c) shared book reading |
| d | Measurement of outcomes: Direct assessment of child's expressive & receptive language; brief written parent questionnaires                                                                                                                                                                                                                                                                                                                                                                                                                                                                                                                                                      |
| e | Appraisal by intervention parents (appended to written questionnaire) of <i>Language for Learning</i> program                                                                                                                                                                                                                                                                                                                                                                                                                                                                                                                                                                   |
| f | Intervention feedback session conducted 2 weeks post-5 year assessment. The language assistant will visit the family to discuss the results of the child's 5-year language assessment and will provide information on further services available depending on the child's needs                                                                                                                                                                                                                                                                                                                                                                                                 |
